# Supplementary material for: TREM-1 links dyslipidemia to inflammation and lipid deposition in atherosclerosis
Source: PubMed Central journal article supplement (PMC5080444; doi:10.1038/ncomms13151), 2016-10-20
Supplement: ncomms13151-s1.pdf [file ncomms13151-s1.pdf]

Supplementary Figure 1

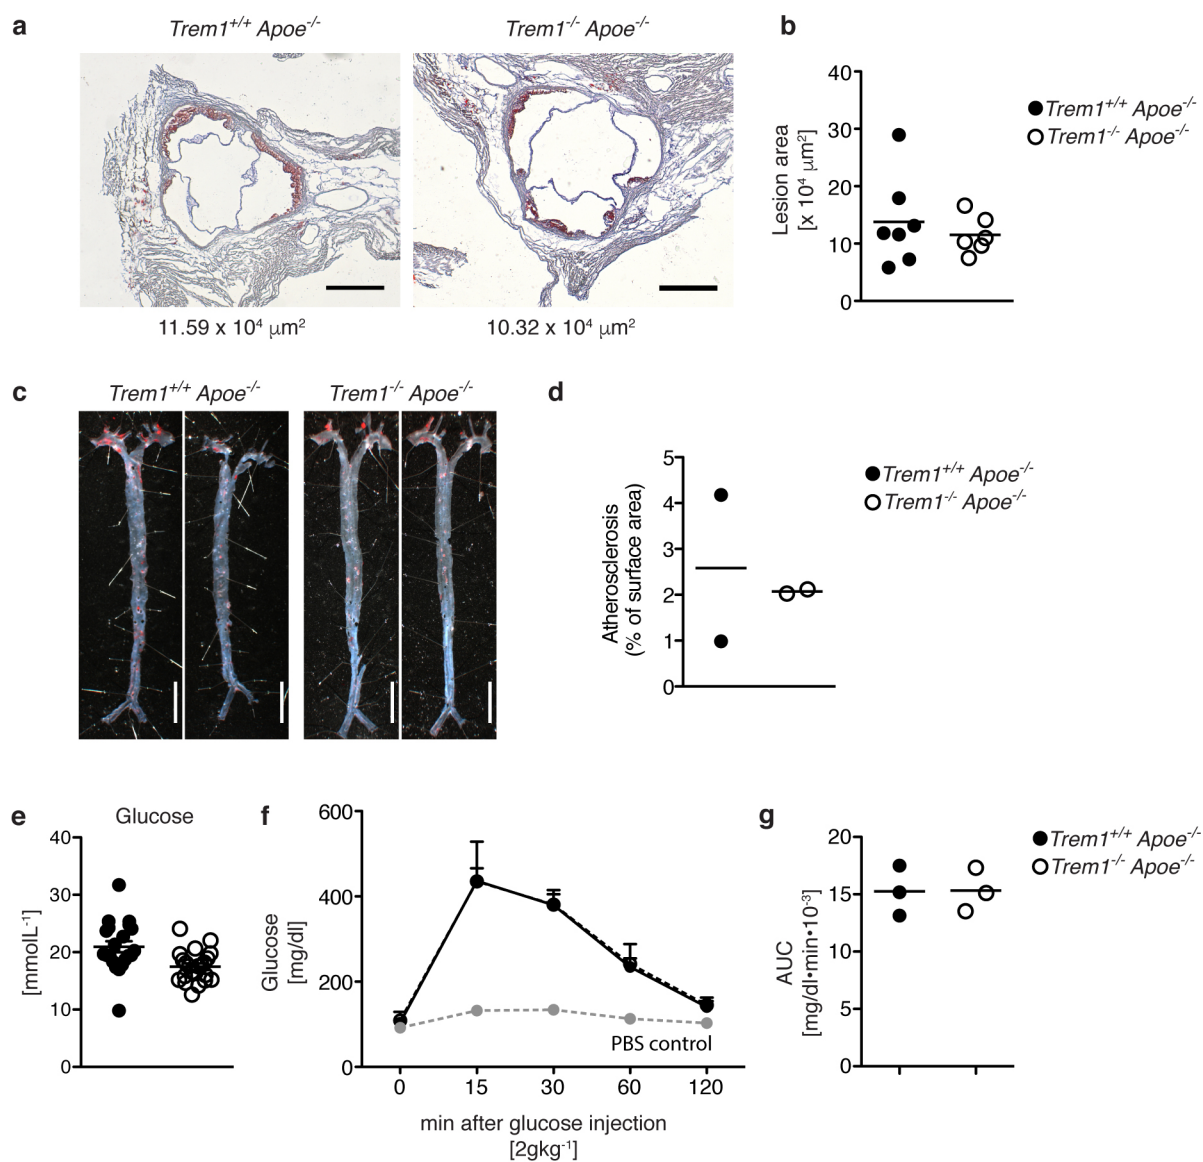

Supplementary Figure 1

**(a-d) Analysis of aortic sinus sections at 4 weeks post HFCD or of aortas derived from 16 week chow-fed mice does not indicate a major impact of TREM-1 during early stages of atherogenesis. (a,b) Extent of atherosclerosis in the aortic root at 4 weeks post HFCD feeding. (a)** Representative examples of ORO stained sections of the aortic sinus. Scale bars indicate 500 μm. **(b)** The lesion area was calculated from 10 sequential ORO stained sections for each *Trem1<sup>+/+</sup> ApoE<sup>-/-</sup>* and *Trem1<sup>-/-</sup> ApoE<sup>-/-</sup>* mouse. Circles show data for individual mice. **(c,d) Extent of atherosclerotic lesions in aortas of 16 week chow-fed mice (n=2 per group). (c) en face** preparations of ORO-stained aortas. Scale bars indicate 10 mm. **(d)** Overall extent of atherosclerosis (aortic lesion surface area expressed as % of total aortic surface).

**(e-g) TREM-1 does not impact on serum glucose levels or glucose clearance in HFCD-fed mice.**

(e) Fasting serum glucose concentrations in *Trem1<sup>+/+</sup> ApoE<sup>-/-</sup>* (n=13) and *Trem1<sup>-/-</sup> ApoE<sup>-/-</sup>* (n=12) mice at 16 weeks post HFCD-feeding were determined on a cobas 8000 clinical chemistry analyzer (Roche diagnostics). (f,g) Intraperitoneal glucose tolerance test (IPGTT). 16 week HFCD-fed *Trem1<sup>+/+</sup> ApoE<sup>-/-</sup>* and *Trem1<sup>-/-</sup> ApoE<sup>-/-</sup>* mice were fasted o/n and challenged i.p. with 2 mg/kg glucose. (f) Blood glucose levels were calculated from blood samples obtained at the indicated intervals from the lateral tail vein using an Accu Chek blood glucose meter (Roche diagnostics). Mean values for n=3 mice per group are shown with error bars indicating the SD. (g) Area under the curve (AUC) of IPGTT as shown in (f). Statistical testing employed the two-tailed t-test. Statistically not significant differences with  $p > 0.05$  are not indicated.

Supplementary Figure 2

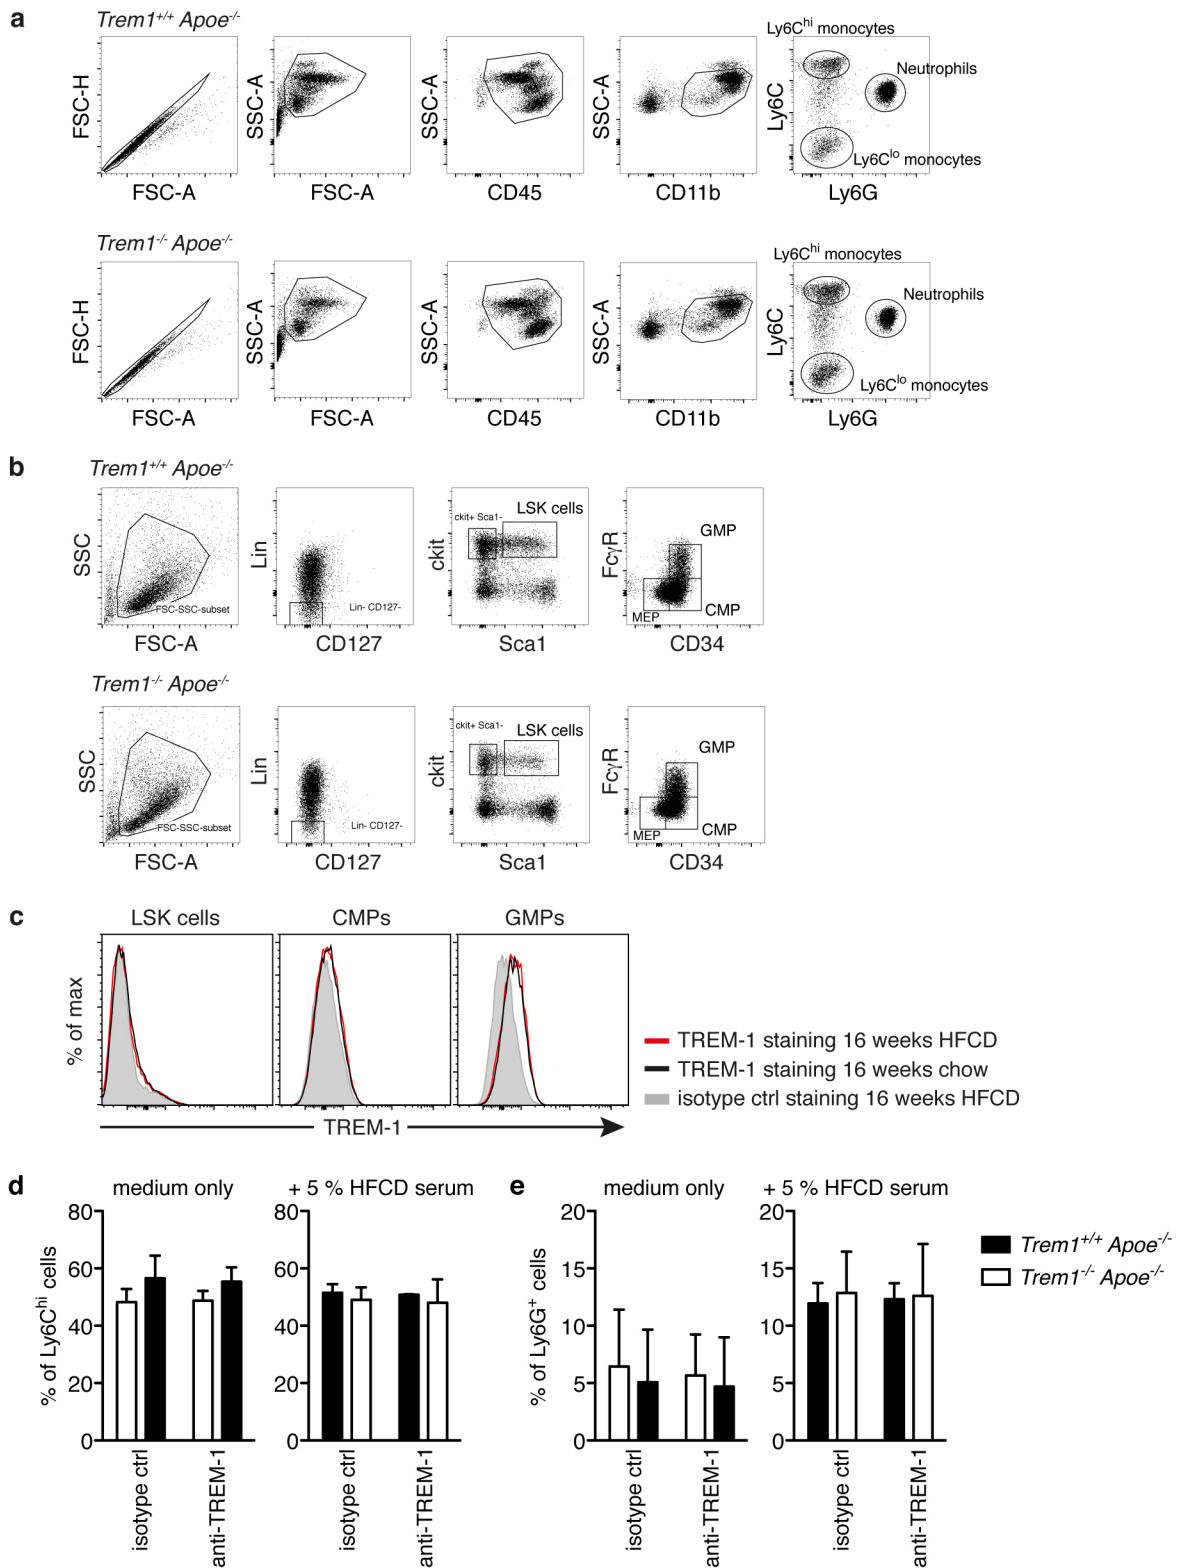

## Supplementary Figure 2

**(a-c) Gating strategies and representative staining panels for peripheral blood myeloid cell subsets and bone marrow hematopoietic stem and progenitor cells.**

**(a)** Gating strategy and representative dot plots for peripheral blood myeloid cell subsets in 16 week HFCD-fed *Trem1<sup>+/+</sup> Apoe<sup>-/-</sup>* and *Trem1<sup>-/-</sup> Apoe<sup>-/-</sup>* mice. **(b)** Gating strategy and representative dot plots for identification of hematopoietic stem cell-enriched LSK cells and myeloid progenitor cells in lineage marker negative (lin<sup>-</sup>) CD127<sup>-</sup> bone marrow (BM) cells of 16 week HFCD-fed *Trem1<sup>+/+</sup> Apoe<sup>-/-</sup>* and *Trem1<sup>-/-</sup> Apoe<sup>-/-</sup>* mice. LSK cells were identified by their Sca1<sup>+</sup>ckit<sup>hi</sup> phenotype while GMP and CMP were discriminated among the Sca1<sup>-</sup>ckit<sup>hi</sup> population based on their expression levels of FcγR and CD34. **(c)** Representative histogram overlays showing TREM-1 surface expression (bold line) in LSK cells, CMP and GMP as defined in **(b)** in 16 week HFCD-fed (red line) versus chow-fed (black line) *Trem1<sup>+/+</sup> Apoe<sup>-/-</sup>* mice. Filled histograms represent matched isotype control stained cells from HFCD-fed mice.

**(d,e) TREM-1-mediated stimulation of GMP isolated from 16 week HFCD-fed *Trem1<sup>+/+</sup> Apoe<sup>-/-</sup>* mice does not augment monocyte differentiation *in vitro*.** **(d,e)** GMP were FACS-sorted from 16 week HFCD-fed *Trem1<sup>+/+</sup> Apoe<sup>-/-</sup>* and *Trem1<sup>-/-</sup> Apoe<sup>-/-</sup>* mice and cultured in 96-well U-bottom plates in IMDM 10% FCS supplemented with IL-11 and TPO (10 ng/ml) as well as SCF and FLT3L (50 ng/ml) in the presence of plate-bound anti-TREM-1 or isotype control mAb (10 μg/ml). Where indicated, the medium was additionally supplemented with 5% HFCD serum. After 72 h of culture, cells were analyzed by flow cytometry for the expression of monocytic and granulocytic lineage markers. **(d)** Relative frequency of Ly6C<sup>hi</sup> monocytes. **(e)** Relative frequency of Ly6G<sup>+</sup> neutrophils. Columns show mean values of n=6 mice per group from two independent experiments with error bars indicating the SD. (Conditions with 5% HFCD serum: mean of n=2 mice from one experiment with error bars indicating the range).

Supplementary Figure 3

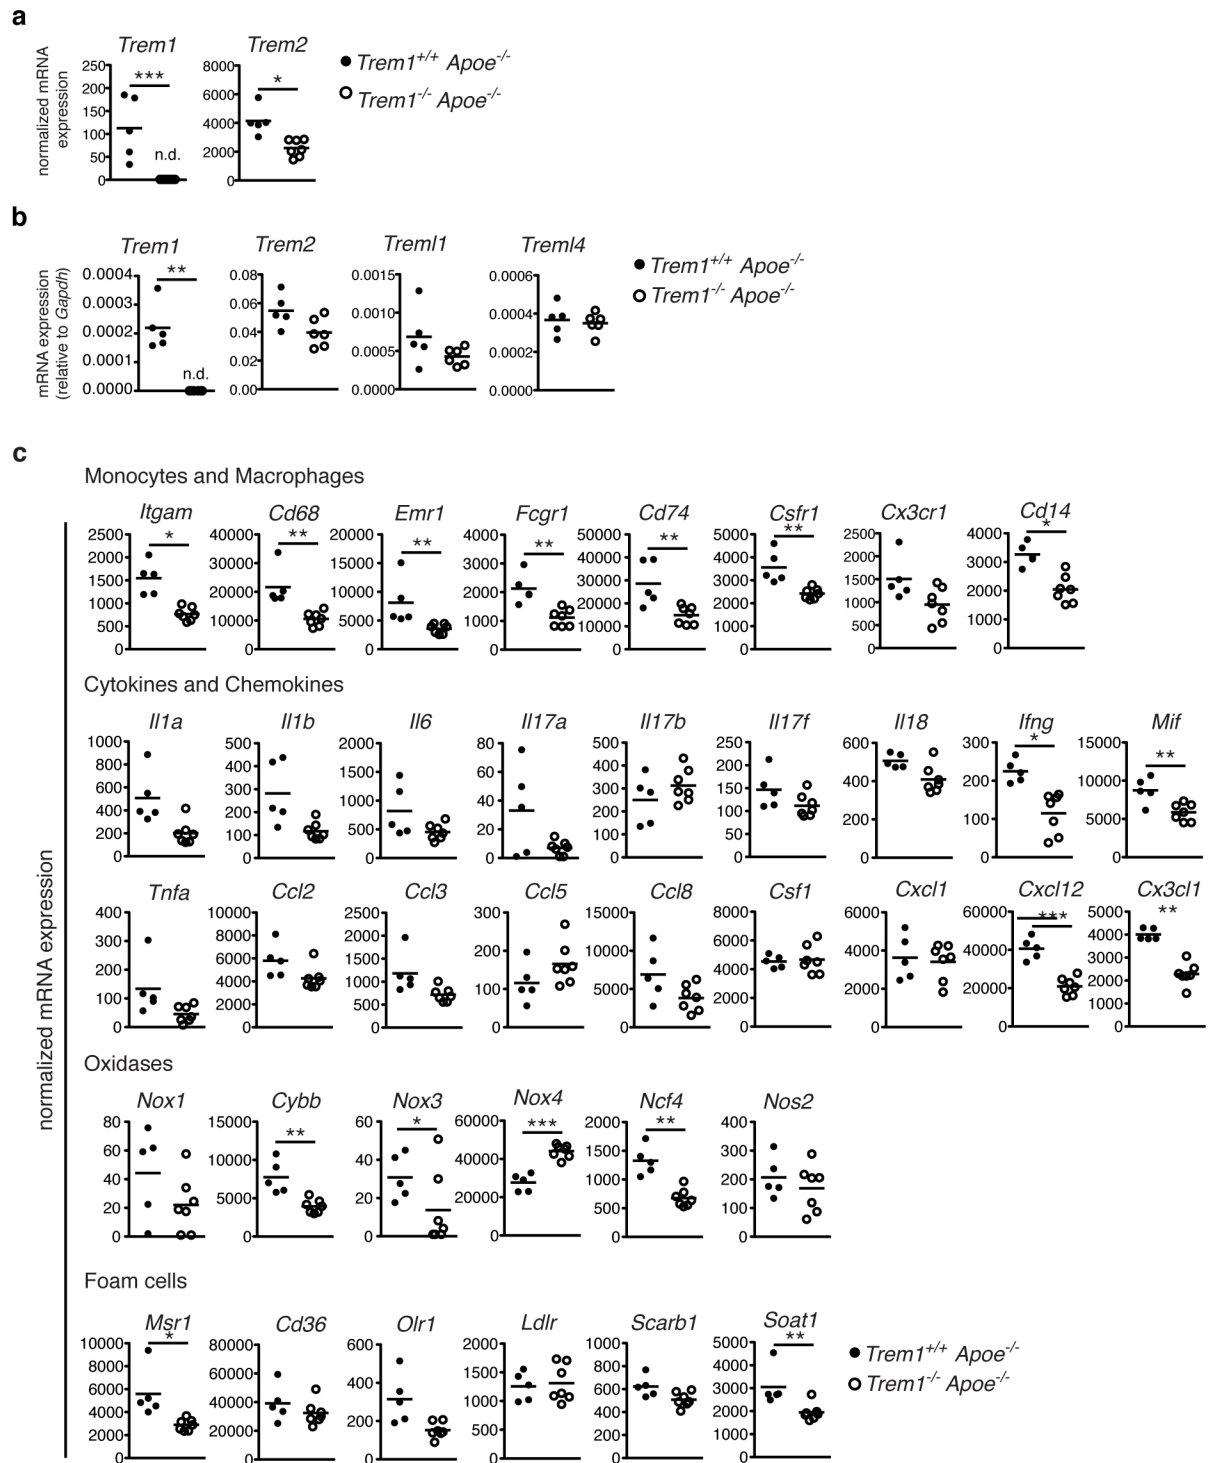

### Supplementary Figure 3

#### Expression of TREM family members and selected genes of interest in the aortic root of 16 week HFCD-fed *Trem1*<sup>+/+</sup> *ApoE*<sup>-/-</sup> versus *Trem1*<sup>-/-</sup> *ApoE*<sup>-/-</sup> mice.

(a) Nanostring nCounter-based quantification of *Trem1* and *Trem2* mRNA expression, nd: not detected. (b) qRT-PCR-based quantification of *Trem1*, *Trem2*, *Trem11* and *Trem41* mRNA. (c) Nanostring nCounter-based mRNA counts of selected genes of interest. Symbols show individual values for 16 week HFCD-fed *Trem1*<sup>+/+</sup> *ApoE*<sup>-/-</sup> (n=5) and *Trem1*<sup>-/-</sup> *ApoE*<sup>-/-</sup> (n=7) mice. \* p < 0.05, \*\* p < 0.01, \*\*\* p < 0.001. Significant differences in gene expression were calculated as described in the Methods section. Statistically not significant differences with p > 0.05 are not indicated.

Supplementary Figure 4

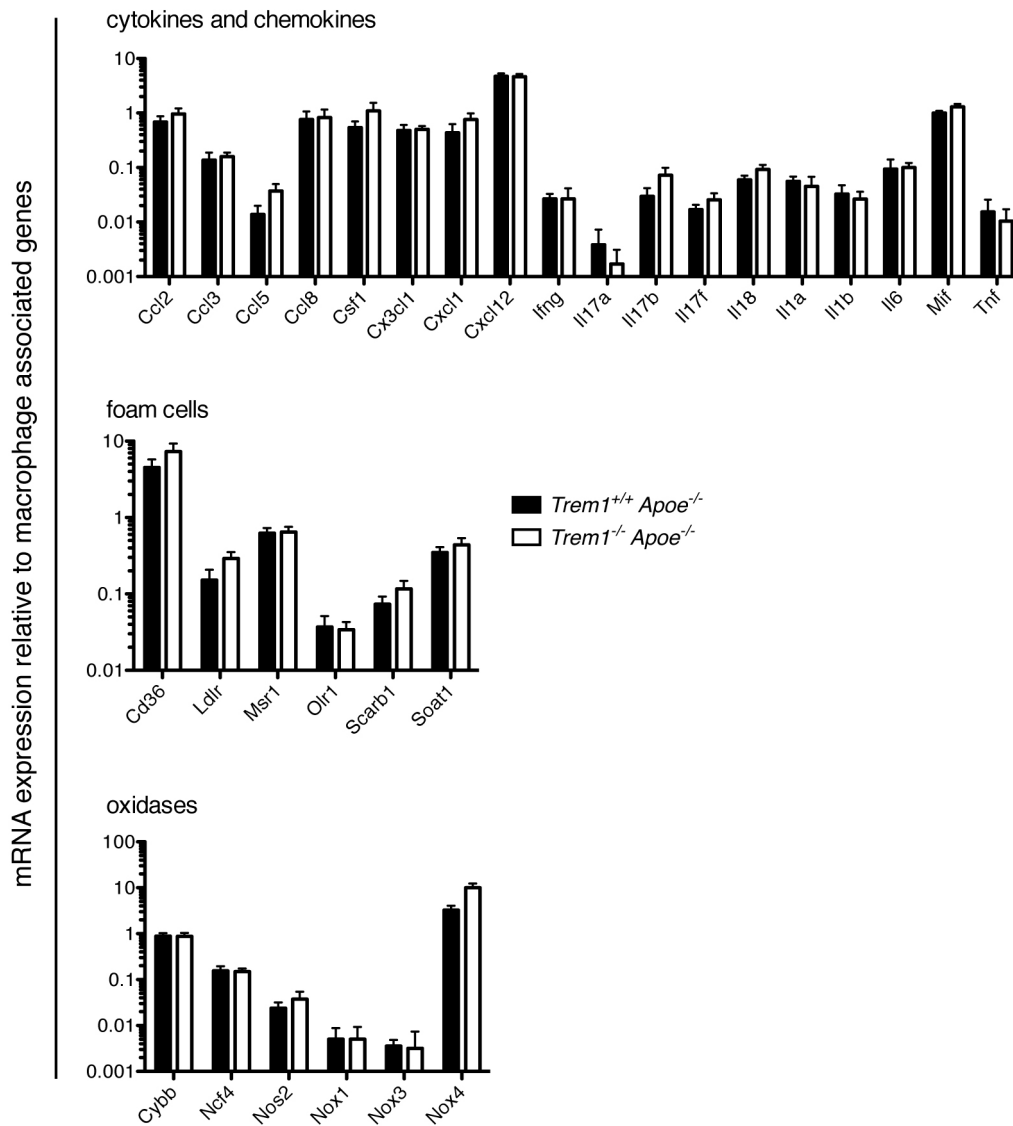

Supplementary Figure 4

**Nanostring-based gene expression data after normalization to combined macrophage markers.**

Expression levels of *Cd14*, *Cd68*, *Cd74*, *Csflr*, *Cx3cr1*, *Emr1*, *Fcgr1* and *Itgam* were used to calculate a mean combined macrophage marker expression level. For each sample, the expression of a candidate gene was calculated relative to the mean macrophage marker expression level. Column graphs show mean mRNA expression levels of genes of interest relative to macrophage-associated gene expression for each group of *Trem1*<sup>+/+</sup> *ApoE*<sup>-/-</sup> (n=5) and *Trem1*<sup>-/-</sup> *ApoE*<sup>-/-</sup> (n=7) mice. Bars indicate mean + SD.

Supplementary Figure 5

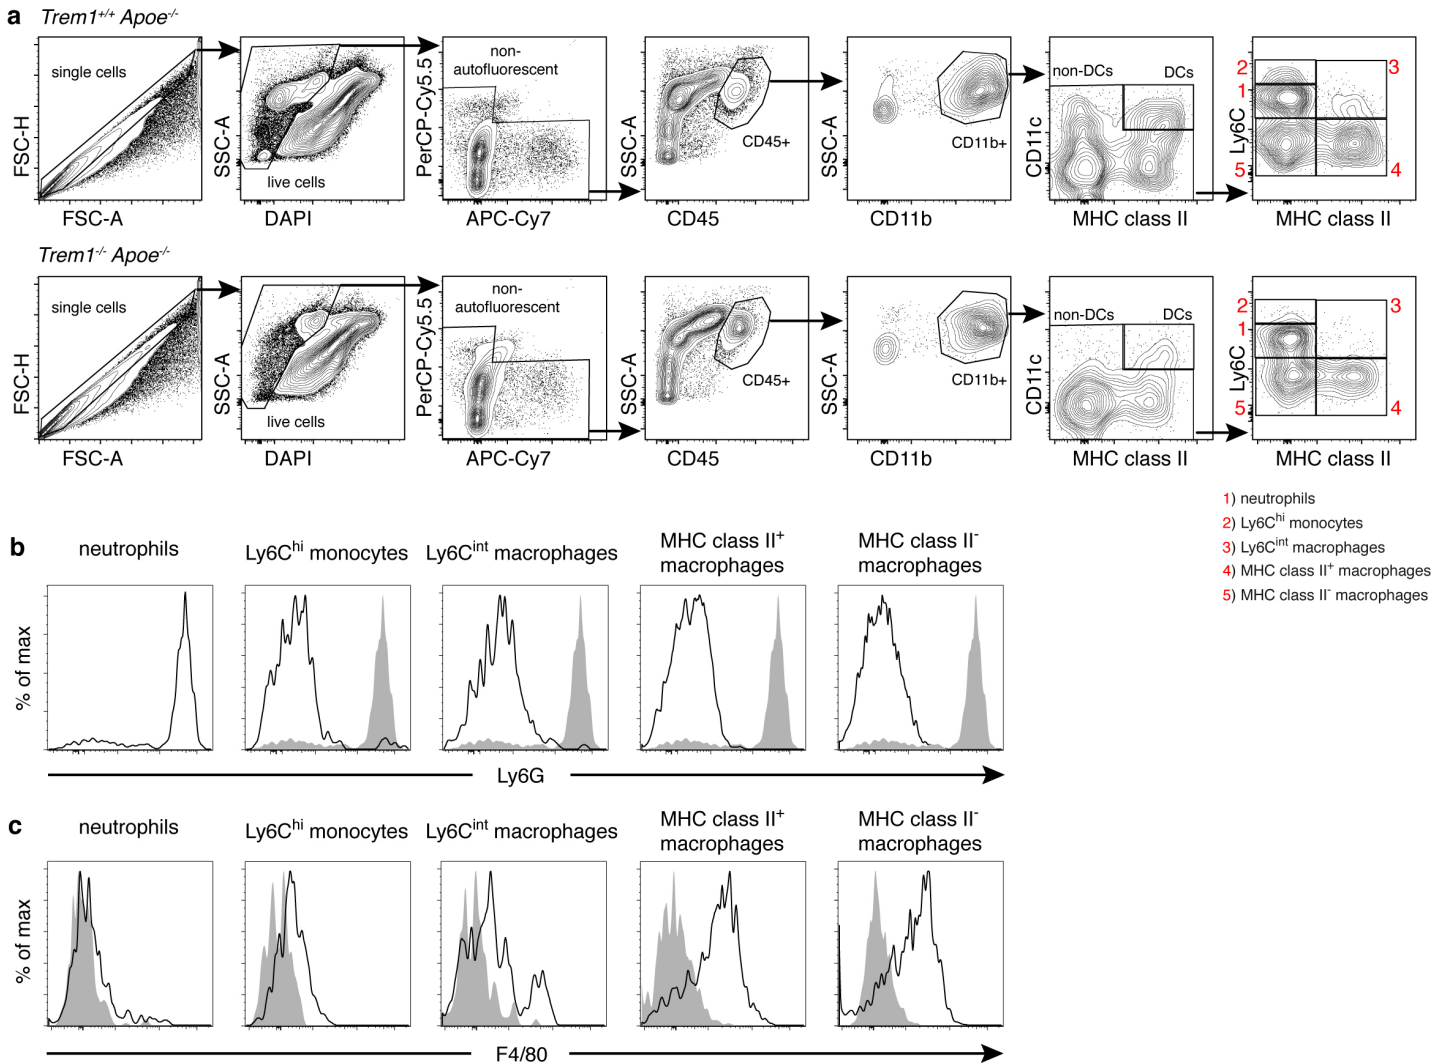

**Supplementary Figure 5**

**Gating strategy for identification of aortic wall-infiltrating myeloid cell subsets.**

**(a)** Gating strategy for identification of aortic wall-infiltrating myeloid cell subsets and representative contour plots for cells retrieved from the digested aortas of 16 week HFCD-fed *Trem1<sup>+/+</sup> Apoe<sup>-/-</sup>* and *Trem1<sup>-/-</sup> Apoe<sup>-/-</sup>* mice. Initial gating comprised the exclusion of doublets, dead (DAPI<sup>+</sup>) and autofluorescent cells. Autofluorescence was defined based on double-positive expression of Ly6G (PerCP-Cy5.5) and MHC class II (APC-Cy7). Among single, live and non-autofluorescent cells leukocytes were subsequently discriminated from endothelial and stromal cells by gating on CD45<sup>+</sup> cells. CD45<sup>+</sup> leukocytes were further subgated into CD11b<sup>+</sup> cells. Among CD11b<sup>+</sup> cells, we gated out MHC class II<sup>+</sup> CD11c<sup>+</sup> cells as these were reported to represent dendritic cells (DC) <sup>1,2</sup>. The remaining CD11b<sup>+</sup> cells were finally separated according to their expression levels of Ly6C and MHC class II to



distinguish five myeloid cell subsets: 1. Neutrophils ( $\text{Ly6C}^{\text{int}}$ ,  $\text{MHCII}^-$ ), 2.  $\text{Ly6C}^{\text{hi}}$  monocytes ( $\text{Ly6C}^{\text{hi}}$ ,  $\text{MHCII}^-$ ) 3.  $\text{Ly6C}^{\text{int}}$  macrophages ( $\text{Ly6C}^{\text{int}}$   $\text{MHCII}^+$ ) 4.  $\text{MHCII}^+$  macrophages ( $\text{Ly6C}^{\text{lo}}$   $\text{MHCII}^+$ ) and 5.  $\text{MHCII}^-$  macrophages ( $\text{Ly6C}^{\text{lo}}$ ,  $\text{MHCII}^-$ ). **(b)** Ly6G surface expression of aortic wall infiltrating myeloid cell subsets. Black lines show Ly6G expression of the indicated subsets while gray filled histograms indicate Ly6G expression of neutrophils in comparison. **(c)** F4/80 expression of aortic wall-infiltrating myeloid cell subsets. Black lines show F4/80 expression of the indicated subsets with gray filled histograms representing isotype controls.

Supplementary Figure 6

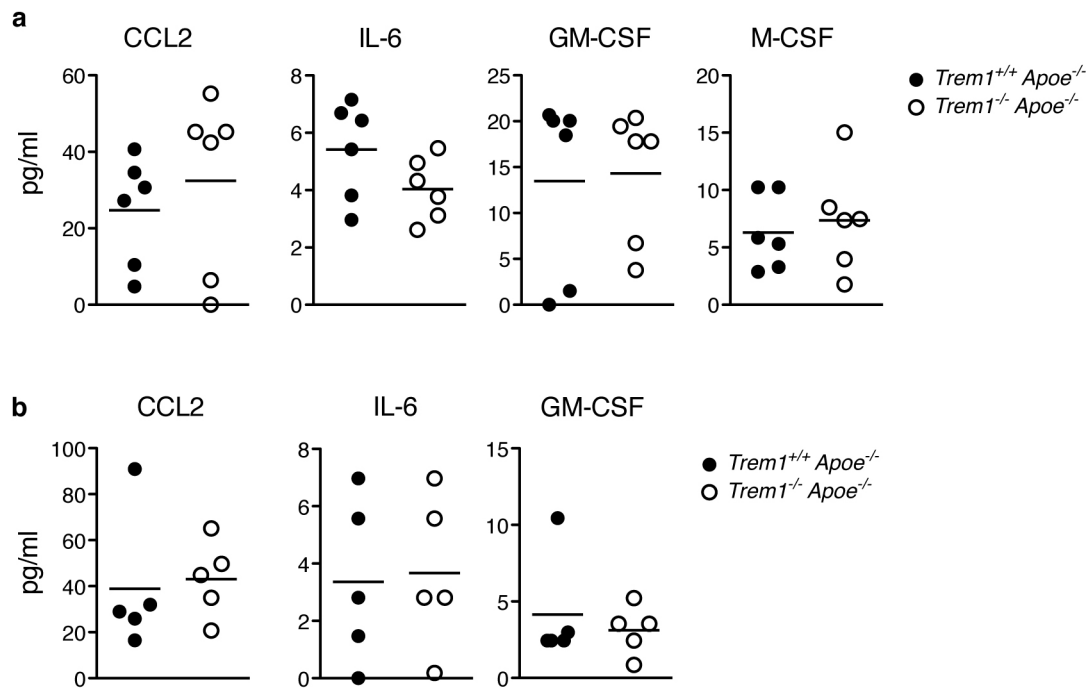

Supplementary Figure 6

**TREM-1 has no appreciable impact on the level of distinct cytokines and chemokines.**

(a) Bone flushes and (b) sera derived from *Trem1*<sup>+/+</sup> *Apoe*<sup>-/-</sup> and *Trem1*<sup>-/-</sup> *Apoe*<sup>-/-</sup> mice at 16 weeks post HFCD feeding were analyzed using either (a) the mouse discovery cytokine and chemokine 31-plex assay (Eve Technologies, Canada) or (b) a Luminex-based mouse cytokine 20-plex assay (LMC0006, Thermo Fisher Scientific) (M-CSF not included in assay). Symbols show individual values for 16 weeks HFCD-fed *Trem1*<sup>+/+</sup> *Apoe*<sup>-/-</sup> (n=5) and *Trem1*<sup>-/-</sup> *Apoe*<sup>-/-</sup> (n=5) mice with lines indicating mean values per group. Statistically not significant differences with  $p > 0.05$  are not indicated.

Supplementary Figure 7

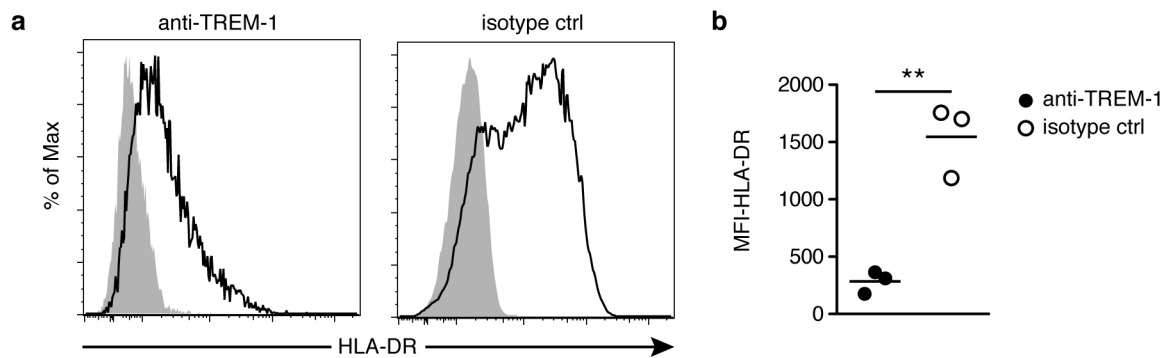

Supplementary Figure 7

**TREM-1-mediated signaling reduces HLA-DR expression during macrophage differentiation *in vitro*.**

Primary human monocytes were differentiated to macrophages with recombinant human M-CSF (50 ng/ml) in the presence of a plate-bound agonistic anti-TREM-1 antibody or an isotype control antibody. After 4 days of culture, macrophages were detached, stained for HLA-DR and analyzed by flow cytometry by gating on single live cells. **(a)** Representative histograms of HLA-DR expression. Black lines represent the HLA-DR-stained cells and gray area show matched isotype control-stained cells. **(b)** MFI values for HLA-DR surface expression (with subtracted MFI values of matched isotype control-stained cells). Circles represent data for individual blood donors, lines indicate mean values of three independent experiments. \*\*  $p < 0.01$  as determined by the two-tailed t test.

**Supplementary Table 1**

List of genes added to the NanoString mouse immunology panel

| <b>RefSeqID</b> | <b>symbol</b>  | <b>logFC</b> | <b>adj.P.Val</b> |
|-----------------|----------------|--------------|------------------|
| NM_013454.3     | <i>Abca1</i>   | -0.548182    | 0.020914         |
| NM_009593.1     | <i>Abcg1</i>   | -0.903426    | 0.007975         |
| NM_007482.3     | <i>Arg1</i>    | -1.605327    | 0.483673         |
| NM_009754.3     | <i>Bcl2l11</i> | -0.656498    | 0.032398         |
| NM_009853.1     | <i>Cd68</i>    | -1.021322    | 0.008107         |
| NM_009141.2     | <i>Cxcl5</i>   | -0.516252    | 0.733208         |
| NM_007837.3     | <i>Ddit3</i>   | -0.098331    | 0.513715         |
| NM_010439.3     | <i>Hmgbl</i>   | 0.084819     | 0.668339         |
| NM_010637.3     | <i>Klf4</i>    | -0.103353    | 0.738274         |
| NM_010700.2     | <i>Ldlr</i>    | 0.047427     | 0.913072         |
| XM_909927.2     | <i>Ly6g</i>    | -1.953349    | 0.250607         |
| NM_008562.3     | <i>Mcl1</i>    | -0.083424    | 0.716881         |
| NM_008587.1     | <i>Mertk</i>   | -0.022212    | 0.922680         |
| NM_008605.3     | <i>Mmp12</i>   | -0.599649    | 0.238986         |
| NM_010902.3     | <i>Nfe2l2</i>  | -0.108595    | 0.573927         |
| NM_145827.3     | <i>Nlrp3</i>   | -0.803574    | 0.284296         |
| NM_009473.2     | <i>Nr1h2</i>   | -0.003419    | 0.993634         |
| NM_013839.2     | <i>Nr1h3</i>   | -0.361939    | 0.088568         |
| NM_011851.3     | <i>Nt5e</i>    | -0.057942    | 0.909367         |
| NM_008744.2     | <i>Ntn1</i>    | -0.133649    | 0.519637         |
| NM_138648.1     | <i>Olr1</i>    | -0.996517    | 0.470639         |
| NM_008920.4     | <i>Prg2</i>    | -0.046406    | 0.887030         |
| NM_016741.1     | <i>Scarb1</i>  | -0.287325    | 0.093439         |
| NM_011355.1     | <i>Sfp1</i>    | -0.809824    | 0.010667         |
| NM_145581.1     | <i>Siglec5</i> | -1.569313    | 0.189712         |
| NM_009230.3     | <i>Soat1</i>   | -0.629950    | 0.006853         |
| NM_146064.1     | <i>Soat2</i>   | -0.994748    | 0.496803         |
| NM_011480.1     | <i>Srebf1</i>  | -0.402164    | 0.063383         |
| NM_011604.3     | <i>Tlr6</i>    | -0.710518    | 0.012207         |
| NM_001025250.3  | <i>Vegfa</i>   | -0.577743    | 0.007533         |

**Supplementary Table 2**

List of genes that were significantly differentially expressed (adj. p. val < 0.05) between 16 weeks HFCD-fed *Trem1*<sup>+/+</sup> *Apoe*<sup>-/-</sup> vs. *Trem1*<sup>-/-</sup> *Apoe*<sup>-/-</sup> mice

| RefSeqID       | symbol          | logFC     | adj.P.Val | RefSeqID       | symbol         | logFC     | adj.P.Val |
|----------------|-----------------|-----------|-----------|----------------|----------------|-----------|-----------|
| NM_021406.3    | <i>Trem1</i>    | -6.548570 | 0.000589  | NM_009914.4    | <i>Ccr3</i>    | -3.754729 | 0.026021  |
| NM_013545.2    | <i>Ptpn6</i>    | -1.315980 | 0.000903  | NM_010188.5    | <i>Fcgr3</i>   | -0.712803 | 0.026021  |
| NM_021704.3    | <i>Cxcl12</i>   | -0.970956 | 0.000903  | NM_009911.3    | <i>Cxcr4</i>   | -0.992579 | 0.027832  |
| NM_007572.2    | <i>C1qa</i>     | -0.912202 | 0.001407  | NM_001113326.1 | <i>Msr1</i>    | -0.901083 | 0.028592  |
| NM_001110323.1 | <i>Klra7</i>    | -3.782532 | 0.001423  | NM_011827.3    | <i>Hcst</i>    | -1.752307 | 0.029092  |
| NM_009851.2    | <i>Cd44</i>     | -0.766548 | 0.001423  | NM_010576.3    | <i>Itga4</i>   | -0.628088 | 0.029092  |
| NM_008528.4    | <i>Blnk</i>     | -1.140291 | 0.002526  | NM_198958.2    | <i>Nox3</i>    | -2.618617 | 0.030037  |
| NM_008397.3    | <i>Itga6</i>    | -0.993086 | 0.003698  | NM_011905.2    | <i>Tlr2</i>    | -0.608692 | 0.030770  |
| NM_008677.2    | <i>Ncf4</i>     | -0.979928 | 0.003698  | NM_019494.1    | <i>Cxcl11</i>  | -2.505075 | 0.032061  |
| NM_007807.2    | <i>Cybb</i>     | -0.962905 | 0.003698  | NM_011095.2    | <i>Lilrb3</i>  | -0.968129 | 0.032061  |
| NM_010233.1    | <i>Fnl1</i>     | -0.749615 | 0.003698  | NM_009754.3    | <i>Bcl2l1l</i> | -0.656498 | 0.032398  |
| NM_007486.4    | <i>Arhgd1b</i>  | -0.730459 | 0.003698  | NM_008337.1    | <i>Ifng</i>    | -1.147221 | 0.032478  |
| NM_010130.1    | <i>Emr1</i>     | -1.094794 | 0.004017  | NM_011693.2    | <i>Vcam1</i>   | -0.779884 | 0.032783  |
| NM_009777.2    | <i>C1qb</i>     | -0.943235 | 0.004017  | NM_009910.2    | <i>Cxcr3</i>   | -3.309227 | 0.036463  |
| NM_009230.3    | <i>Soat1</i>    | -0.629950 | 0.006853  | NM_019732.2    | <i>Runx3</i>   | -3.035197 | 0.040985  |
| NM_031178.2    | <i>Tlr9</i>     | -1.117207 | 0.007283  | NM_016960.1    | <i>Ccl20</i>   | -3.135620 | 0.041094  |
| NM_010186.5    | <i>Fcgr1</i>    | -0.947866 | 0.007283  | NM_011518.2    | <i>Syk</i>     | -0.654921 | 0.044742  |
| NM_001042605.1 | <i>Cd74</i>     | -0.926043 | 0.007283  | NM_013532.2    | <i>Lilrb4</i>  | -0.822303 | 0.047020  |
| NM_011577.1    | <i>Tgfb1</i>    | -0.601625 | 0.007283  | NM_008355.2    | <i>Il13</i>    | -2.196345 | 0.049654  |
| NM_011610.3    | <i>Tnfrsf1b</i> | -0.932845 | 0.007533  | NM_008349.5    | <i>Il10rb</i>  | -0.493404 | 0.005406  |
| NM_009369.4    | <i>Tgfb1</i>    | -0.644661 | 0.007533  | NM_001037859.1 | <i>Csflr</i>   | -0.542986 | 0.007283  |
| NM_008404.4    | <i>Itgb2</i>    | -1.002995 | 0.007630  | NM_001025250.3 | <i>Vegfa</i>   | -0.577743 | 0.007533  |
| NM_010185.4    | <i>Fcer1g</i>   | -1.104990 | 0.007717  | NM_010798.2    | <i>Mif</i>     | -0.574122 | 0.008491  |
| NM_009142.3    | <i>Cx3cl1</i>   | -0.841099 | 0.007717  | NM_010508.1    | <i>Ifnar1</i>  | -0.366953 | 0.009241  |
| NM_009593.1    | <i>Abcg1</i>    | -0.903426 | 0.007975  | NM_009812.2    | <i>Casp8</i>   | -0.343917 | 0.009241  |
| NM_009853.1    | <i>Cd68</i>     | -1.021322 | 0.008107  | NM_007544.3    | <i>Bid</i>     | -0.583093 | 0.011645  |
| NM_001113474.1 | <i>Lair1</i>    | -1.077760 | 0.008895  | NM_009982.2    | <i>Ctsc</i>    | -0.410117 | 0.011920  |
| NM_011662.2    | <i>Tyrobp</i>   | -0.987466 | 0.008895  | NM_009371.2    | <i>Tgfb2</i>   | -0.395849 | 0.015089  |
| NM_001111021.1 | <i>Runx1</i>    | -0.895071 | 0.008895  | NM_016923.1    | <i>Ly96</i>    | -0.477177 | 0.016295  |
| NM_010378.2    | <i>H2-Aa</i>    | -0.806005 | 0.009241  | NM_001113553.1 | <i>Irak2</i>   | -0.305006 | 0.018486  |
| NM_001170632.1 | <i>Fcamr</i>    | -3.296913 | 0.009272  | NM_008720.2    | <i>Npc1</i>    | -0.377297 | 0.018592  |
| NM_001033122.3 | <i>Cd69</i>     | -3.300441 | 0.009388  | NM_008823.3    | <i>Cfp</i>     | -0.577043 | 0.020476  |
| NM_008604.3    | <i>Mme</i>      | -0.884249 | 0.009915  | NM_013454.3    | <i>Abca1</i>   | -0.548182 | 0.020914  |
| NM_010382.2    | <i>H2-Eb1</i>   | -1.015780 | 0.010136  | NM_011113.3    | <i>Plaur</i>   | -0.542416 | 0.022895  |
| NM_011355.1    | <i>Sfp1</i>     | -0.809824 | 0.010667  | NM_011640.1    | <i>Trp53</i>   | -0.382943 | 0.028214  |
| NM_021281.2    | <i>Ctss</i>     | -1.030240 | 0.011031  | NM_009807.2    | <i>Casp1</i>   | -0.590112 | 0.029092  |
| NM_013640.3    | <i>Psmb10</i>   | -0.688050 | 0.011031  | NM_009046.2    | <i>Relb</i>    | -0.365291 | 0.030723  |
| NM_001082960.1 | <i>Itgam</i>    | -1.004610 | 0.011920  | NM_001163554.1 | <i>Pou2f2</i>  | -0.597801 | 0.035774  |
| NM_011604.3    | <i>Tlr6</i>     | -0.710518 | 0.012207  | NM_001164735.1 | <i>Crlf2</i>   | -0.419599 | 0.036463  |
| NM_001271430.1 | <i>Cd82</i>     | -0.607500 | 0.012303  | NM_009778.2    | <i>C3</i>      | -0.418029 | 0.036463  |
| NM_010745.2    | <i>Ly86</i>     | -0.762518 | 0.015393  | NM_010515.1    | <i>Igf2r</i>   | -0.284202 | 0.036463  |
| NM_011638.3    | <i>Tfrc</i>     | -1.094356 | 0.016295  | NM_010549.3    | <i>Il11ra1</i> | -0.512377 | 0.038363  |
| NM_001038604.1 | <i>Clec5a</i>   | -1.069723 | 0.016295  | NM_153098.3    | <i>Cd109</i>   | -0.402790 | 0.041094  |
| NM_008348.2    | <i>Il10ra</i>   | -1.138435 | 0.016696  | NM_133990.4    | <i>Il13ra1</i> | -0.419770 | 0.046369  |
| NM_012057.3    | <i>Irf5</i>     | -0.666845 | 0.018486  | NM_019777.3    | <i>Ikbke</i>   | -0.345539 | 0.047020  |
| NM_031254.2    | <i>Trem2</i>    | -0.895160 | 0.019268  | NM_001048177.1 | <i>Jak2</i>    | 0.347616  | 0.032061  |
| NM_007649.4    | <i>Cd48</i>     | -1.118095 | 0.019909  | NM_011633.1    | <i>Traf5</i>   | 0.360299  | 0.025435  |
| NM_001043317.2 | <i>Cd22</i>     | -1.316593 | 0.020476  | NM_007987.2    | <i>Fas</i>     | 0.341247  | 0.020486  |
| NM_011210.3    | <i>Ptprc</i>    | -0.843256 | 0.020486  | NM_010578.1    | <i>Itgb1</i>   | 0.385154  | 0.011645  |
| NM_207105.2    | <i>H2-Ab1</i>   | -0.812375 | 0.020486  | NM_009848.3    | <i>Entpd1</i>  | 0.388919  | 0.009241  |
| NM_001037177.1 | <i>Nfate2</i>   | -0.849600 | 0.022073  | XM_356827.6    | <i>C7</i>      | 0.634353  | 0.009241  |
| NM_008873.2    | <i>Plau</i>     | -0.791118 | 0.022073  | NM_008332.2    | <i>Ifi2</i>    | 0.575927  | 0.007283  |
| NM_001077189.1 | <i>Fcgr2b</i>   | -0.733583 | 0.022895  | NM_011364.3    | <i>Sh2d1a</i>  | 4.016440  | 0.006853  |
| NM_009856.2    | <i>Cd83</i>     | -0.622932 | 0.022895  | NM_008816.2    | <i>Pecam1</i>  | 0.621827  | 0.003698  |
| NM_013482.2    | <i>Btk</i>      | -0.921450 | 0.023260  | NM_015760.4    | <i>Nox4</i>    | 0.682014  | 0.000903  |
| NM_008250.2    | <i>Hlx</i>      | -0.778719 | 0.023930  |                |                |           |           |

**Supplementary Table 3**

**Maximum values of carotid intima-media thickness (IMT) according to the *TREMI* SNP rs2234237 genotype in the 421 CoLaus substudy participants.**

|                       | <b>AA</b>  | <b>AT</b> | <b>TT</b> | <b>p-value<br/>ANOVA</b> | <b>p-value<br/>additive effect</b> |
|-----------------------|------------|-----------|-----------|--------------------------|------------------------------------|
| N (% total)           | 340 (80.8) | 75 (17.8) | 6 (1.4)   |                          |                                    |
| Left carotid          |            |           |           |                          |                                    |
| Unadjusted            | 0.90±0.14  | 0.88±0.13 | 0.74±0.07 | 0.02                     | 0.007                              |
| Adjusted <sup>§</sup> | 0.90±0.01  | 0.89±0.02 | 0.75±0.05 | 0.02                     | 0.006                              |
| Right carotid         |            |           |           |                          |                                    |
| Unadjusted            | 0.85±0.15  | 0.82±0.12 | 0.77±0.05 | 0.14                     | 0.14                               |
| Adjusted <sup>§</sup> | 0.85±0.01  | 0.83±0.02 | 0.77±0.05 | 0.20                     | 0.12                               |

Results are expressed in mm and as mean ± standard deviation for unadjusted data or as adjusted mean ± standard error for multivariable-adjusted data. Statistical analysis by ANOVA and by linear regression supposing an additive genetic effect (qtl SNP command of Stata). <sup>§</sup> adjusted for gender, smoking status (never, former, current), age (continuous) and body mass index (continuous).

**Supplementary Table 4****Clinical characteristics of the 421 CoLaus substudy participants according to their *TREMI* SNP rs2234237 genotype.**

|                          | <b>AA</b>  | <b>AT</b>  | <b>TT</b>  | <b>P-value</b> |
|--------------------------|------------|------------|------------|----------------|
| Sample size              | 340        | 75         | 6          |                |
| Women (%)                | 209 (61.5) | 42 (56.0)  | 2 (33.3)   | 0.260          |
| Age (years)              | 61.5 ± 5.3 | 60.6 ± 5.6 | 59.0 ± 5.2 | 0.253          |
| BMI (kg/m <sup>2</sup> ) | 26.2 ± 4.4 | 25.9 ± 4.0 | 27.2 ± 5.5 | 0.718          |
| BMI categories (%)       |            |            |            | 0.776          |
| Normal                   | 145 (42.7) | 34 (45.3)  | 3 (50.0)   |                |
| Overweight               | 132 (38.8) | 28 (37.3)  | 1 (16.7)   |                |
| Obese                    | 63 (18.5)  | 13 (17.3)  | 2 (33.3)   |                |
| Smoking (%)              |            |            |            | 0.602          |
| Never                    | 144 (42.4) | 31 (41.3)  | 2 (33.3)   |                |
| Former                   | 127 (37.4) | 33 (44.0)  | 2 (33.3)   |                |
| Current                  | 69 (20.3)  | 11 (14.7)  | 2 (33.3)   |                |
| Blood pressure (mm Hg)   |            |            |            |                |
| Systolic                 | 142 ± 21   | 144 ± 19   | 148 ± 27   | 0.592          |
| Diastolic                | 85 ± 12    | 87 ± 12    | 89 ± 13    | 0.260          |

BMI, body mass index. Results are expressed as number of participants (or percentage) or as average ± standard deviation. Between-group comparisons using Fisher's exact test for categorical variables or analysis of variance for continuous variables.

## References

1. Choi, J.-H. *et al.* Flt3 signaling-dependent dendritic cells protect against atherosclerosis. *Immunity* **35**, 819–831 (2011).
2. Ensan, S. *et al.* Self-renewing resident arterial macrophages arise from embryonic CX3CR1+ precursors and circulating monocytes immediately after birth. *Nat Immunol* **17**, 159–168 (2015).
